# Supplementary material for: A mechanistic reinterpretation of fast inactivation in voltage-gated Na+ channels
Source: Nat Commun. 2023 Aug 21;14:5072. doi: 10.1038/s41467-023-40514-4 (PMC10442390; doi:10.1038/s41467-023-40514-4)
Supplement: Supplementary file 4 — Source Data [file 41467_2023_40514_MOESM4_ESM.xlsx]

## Sheet: Fig.1A
z	r
-21.5	3.54026
-21.375	3.4742
-21.25	3.43701
-21.125	3.42846
-21	3.45027
-20.875	3.40975
-20.75	3.37243
-20.625	3.33584
-20.5	3.30592
-20.375	3.28844
-20.25	3.27422
-20.125	3.25636
-20	3.2427
-19.875	3.22655
-19.75	3.21363
-19.625	3.1986
-19.5	3.18425
-19.375	3.16514
-19.25	3.14805
-19.125	3.13065
-19	3.11568
-18.875	3.1036
-18.75	3.09349
-18.625	3.05705
-18.5	3.02135
-18.375	2.91405
-18.25	2.81274
-18.125	2.71832
-18	2.62813
-17.875	2.54792
-17.75	2.47115
-17.625	2.40766
-17.5	2.35322
-17.375	2.30794
-17.25	2.27226
-17.125	2.20867
-17	2.15165
-16.875	2.09462
-16.75	2.04465
-16.625	2.00258
-16.5	1.96828
-16.375	1.94121
-16.25	1.922
-16.125	1.9107
-16	1.90722
-15.875	1.83255
-15.75	1.75983
-15.625	1.69
-15.5	1.62302
-15.375	1.5584
-15.25	1.49717
-15.125	1.44263
-15	1.39207
-14.875	1.34356
-14.75	1.29924
-14.625	1.25985
-14.5	1.22514
-14.375	1.19582
-14.25	1.17149
-14.125	1.15249
-14	1.13832
-13.875	1.1291
-13.75	1.12498
-13.625	1.1054
-13.5	1.09129
-13.375	1.05888
-13.25	1.03452
-13.125	1.01872
-13	1.01187
-12.875	1.01504
-12.75	1.02507
-12.625	1.04246
-12.5	1.0697
-12.375	1.10961
-12.25	1.15595
-12.125	1.20073
-12	1.25056
-11.875	1.24681
-11.75	1.24863
-11.625	1.25389
-11.5	1.26449
-11.375	1.22806
-11.25	1.25287
-11.125	1.28803
-11	1.33195
-10.875	1.3643
-10.75	1.39973
-10.625	1.41888
-10.5	1.44913
-10.375	1.38557
-10.25	1.32776
-10.125	1.26267
-10	1.20535
-9.875	1.15738
-9.75	1.11743
-9.625	1.08721
-9.5	1.06666
-9.375	1.05696
-9.25	1.05679
-9.125	1.0663
-9	1.08279
-8.875	1.03518
-8.75	0.99256
-8.625	0.95485
-8.5	0.92206
-8.375	0.89617
-8.25	0.87609
-8.125	0.86104
-8	0.85199
-7.875	0.84994
-7.75	0.85387
-7.625	0.86305
-7.5	0.87818
-7.375	0.90037
-7.25	0.92727
-7.125	0.95953
-7	0.99719
-6.875	1.02208
-6.75	1.05119
-6.625	1.05931
-6.5	1.07373
-6.375	1.0986
-6.25	1.12854
-6.125	1.16516
-6	1.20799
-5.875	1.12818
-5.75	1.30843
-5.625	1.38404
-5.5	1.46273
-5.375	1.54025
-5.25	1.61971
-5.125	1.71082
-5	1.80401
-4.875	1.89449
-4.75	1.98697
-4.625	2.08229
-4.5	2.179
-4.375	2.26822
-4.25	2.35756
-4.125	2.42664
-4	2.501
-3.875	2.57181
-3.75	2.63266
-3.625	2.59728
-3.5	2.62775
-3.375	2.6741
-3.25	2.7399
-3.125	2.77337
-3	2.81278
-2.875	2.85728
-2.75	2.90645
-2.625	2.96178
-2.5	3.02123
-2.375	3.0883
-2.25	3.15998
-2.125	3.1783
-2	3.20206
-1.875	3.21411
-1.75	3.23558
-1.625	3.16126
-1.5	3.2779
-1.375	3.32685
-1.25	3.37922
-1.125	3.3614
-1	3.34637
-0.875	3.33409
-0.75	3.32462
-0.625	3.31961
-0.5	3.3178
-0.375	3.26708
-0.25	3.22911
-0.125	3.22341
0	3.22225
0.125	3.28288
0.25	3.36906
0.375	3.38975
0.5	3.41352
0.625	3.38691
0.75	3.36257
0.875	3.29381
1	3.39919
1.125	3.431
1.25	3.46456
1.375	3.48927
1.5	3.52016
1.625	3.52136
1.75	3.52759
1.875	3.51811
2	3.51373
2.125	3.51488
2.25	3.52105
2.375	3.52825
2.5	3.54059
2.625	3.55819
2.75	3.58085
2.875	3.60633
3	3.6371
3.125	3.66255
3.25	3.69529
3.375	3.6556
3.5	3.61647
3.625	3.52163
3.75	3.42881
3.875	3.33803
4	3.24945
4.125	3.16337
4.25	3.07976
4.375	2.99914
4.5	2.92122
4.625	2.84622
4.75	2.77382
4.875	2.70483
5	2.63748
5.125	2.57655
5.25	2.51757
5.375	2.4635
5.5	2.41354
5.625	2.36902
5.75	2.32709
5.875	2.29016
6	2.25602
6.125	2.2294
6.25	2.20632
6.375	2.17256
6.5	2.14248
6.625	2.09839
6.75	2.05751
6.875	2.01504
7	1.97702
7.125	1.95801
7.25	1.93969
7.375	1.92153
7.5	1.90712
7.625	1.89906
7.75	1.8954
7.875	1.89674
8	1.90287
8.125	1.91367
8.25	1.92914
8.375	1.94948
8.5	1.97367
8.625	1.98825
8.75	2.00825
8.875	2.02897
9	2.05412
9.125	2.03351
9.25	2.01744
9.375	1.99519
9.5	1.97778
9.625	1.95694
9.75	1.93544
9.875	1.92268
10	1.91253
10.125	1.90502
10.25	1.90179
10.375	1.88623
10.5	1.8757
10.625	1.87106
10.75	1.87141
10.875	1.87593
11	1.88569
11.125	1.90082
11.25	1.9204
11.375	1.94656
11.5	1.97664
11.625	1.99562
11.75	2.01869
11.875	2.0274
12	2.03968
12.125	2.05679
12.25	2.07806
12.375	2.09708
12.5	2.11966
12.625	2.10634
12.75	2.09963
12.875	2.10067
13	2.10842
13.125	2.1223
13.25	2.14231
13.375	2.17061
13.5	2.2047
13.625	2.24505
13.75	2.29087
13.875	2.34283
14	2.40069
14.125	2.46432
14.25	2.533
14.375	2.60662
14.5	2.6848
14.625	2.73604
14.75	2.79166
14.875	2.82393
15	2.86167
15.125	2.88687
15.25	2.91934
15.375	2.93914
15.5	2.95886
15.625	2.97112
15.75	2.98101
15.875	2.98378
16	2.99022
16.125	3.00011
16.25	3.01367
16.375	3.0308
16.5	3.05162
16.625	3.05917
16.75	3.06705
16.875	3.06879
17	3.07256
17.125	3.08307
17.25	3.0948
17.375	3.11011
17.5	3.1266
17.625	3.14874
17.75	3.1739
17.875	3.20225
18	3.232
18.125	3.26441
18.25	3.29968
18.375	3.33914
18.5	3.38131
18.625	3.42664
18.75	3.47339
18.875	3.52303
19	3.57481
19.125	3.62861
19.25	3.6848
19.375	3.74414
19.5	3.80538
19.625	3.86944
19.75	3.93451
19.875	3.99596
20	4.05952
	4.13859
	4.0748
	4.01329
	3.95552
	3.89983
	3.84655
	3.79594
	3.74879
	3.70354
	3.66047
	3.62029
	3.58579
	3.55209
	3.52256
	3.49523
	3.47097
	3.44943
	3.43312
	3.42004
	3.40542
	3.39393
	3.38305
	3.37264
	3.3671
	3.36493
	3.36529
	3.36902
	3.37635
	3.38706
	3.39203
	3.39976
	3.37968
	3.36566
	3.35822
	3.35655
	3.33268
	3.31421
	3.30196
	3.29596
	3.2526
	3.21167
	3.16092
	3.11258
	3.06776
	3.0255
	2.97652
	2.92827
	2.87512
	2.8242
	2.7766
	2.73037
	2.68659
	2.6459
	2.58074
	2.51827
	2.45984
	2.40312
	2.35012
	2.30021
	2.25507
	2.21279
	2.17392
	2.13885
	2.00452
	2.00774
	1.99443
	1.98792
	1.96267
	1.94164
	1.92659
	1.90927
	1.85091
	1.79899
	1.75396
	1.71441
	1.68364
	1.65912
	1.64141
	1.63079
	1.60001
	1.57462
	1.51645
	1.46367
	1.41705
	1.37693
	1.34259
	1.31428
	1.29172
	1.274
	1.24227
	1.21647
	1.1985
	1.19032
	1.19482
	1.20515
	1.21834
	1.23908
	1.22958
	1.22599
	1.23003
	1.23947
	1.25357
	1.2725
	1.29789
	1.32751
	1.35214
	1.38166
	1.37203
	1.36939
	1.37626
	1.38982
	1.40202
	1.42009
	1.42069
	1.43124
	1.41573
	1.40522
	1.40002
	1.40026
	1.40763
	1.42038
	1.43565
	1.45611
	1.48517
	1.51928
	1.55625
	1.59792
	1.645
	1.69528
	1.75035
	1.80941
	1.87139
	1.93704
	2.00711
	2.08037
	2.15655
	2.23559
	2.31761
	2.40171
	2.48843
	2.57699
	2.66771
	2.76048
	2.85616
	2.95253
	3.05036
	3.14788
	3.21518
	3.28589
	3.35892
	3.4347
	3.51327
	3.59432
	3.66189
	3.73227
	3.7954
	3.86261
	3.90819
	3.98304
	4.05042
	4.11966
	4.18888
	4.2599
	4.33431
	4.41034
	4.46031
	4.51284
	4.52994
	4.55515
	4.58944
	4.62777
	4.6638
	4.70513
	4.70277
	4.69605
	4.67774
	4.6656
	4.65777
	4.65502
	4.66201
	4.67585
	4.69435
	4.72045
	4.6815
	4.64586
	4.57542
	4.51014
	4.45048
	4.39648
	4.34842
	4.30675
	4.22549
	4.14564
	4.06366
	3.98339
	3.90467
	3.8278
	3.75378
	3.67983
	3.61021
	3.54087
	3.47511
	3.41171
	3.35003
	3.2898
	3.23362
	3.18012
	3.13063
	3.08409
	3.03954
	2.99813
	2.96053
	2.92514
	2.89331
	2.86494
	2.82345
	2.78308
	2.73058
	2.68251
	2.63867
	2.59939
	2.56472
	2.53452
	2.50846
	2.48684
	2.4535
	2.42343
	2.38966
	2.35975
	2.33034
	2.3049
	2.28979
	2.27841
	2.25595
	2.23614
	2.21886
	2.2052
	2.19344
	2.18577
	2.16915
	2.15508
	2.1244
	2.09642
	2.0752
	2.05667
	2.04263
	2.03304
	2.00911
	1.98883
	1.95075
	1.91606
	1.88652
	1.8625
	1.84384
	1.83104
	1.8253
	1.82528
	1.82958
	1.83978
	1.73596
	1.87559
	1.89345
	1.91732
	1.94921
	1.98631
	1.99801
	2.01398
	1.94913
	2.05244
	2.07293
	2.09715
	2.11823
	2.14295
	2.1716
	2.2042
	2.2413
	2.28201
	2.32629
	2.37397
	2.39308
	2.41779
	2.44708
	2.48184
	2.52244
	2.56834
	2.61908
	2.67474
	2.71962
	2.76751
	2.78867
	2.81575
	2.84745
	2.88491
	2.93035
	2.97787
	2.99041
	3.00633
	3.00932
	3.01566
	3.02578
	3.03921
	3.05692
	3.07836
	3.10396
	3.13309
	3.15223
	3.17424
	3.18192
	3.19282
	3.20633
	3.22275
	3.24379
	3.26791
	3.29407
	3.32311
	3.34983
	3.37957
	3.39308
	3.40959
	3.42976
	3.45338
	3.47964
	3.50913
	3.54139
	3.57689
	3.61724
	3.65387
	3.70534
	3.75754
	3.80894
	3.86308
	3.9198
	3.97842
	4.0577
	4.01672
	3.97848
	3.94375
	3.9104
	3.8806
	3.85271
	3.81822
	3.78635
	3.7586
	3.73187
	3.70912
	3.68922
	3.67094
	3.65449
	3.61031
	3.56746
	3.52214
	3.47941
	3.41196
	3.34655
	3.27628
	3.20955
	3.11687
	3.02735
	2.92519
	2.83077
	2.74557
	2.66944
	2.60192
	2.54404
	2.49836
	2.46392
	2.4392
	2.42596
	2.40286
	2.38556
	2.3028
	2.22637
	2.14137
	2.05791
	1.96418
	1.87234
	1.78439
	1.6982
	1.61791
	1.53826
	1.45189
	1.39749
	1.33846
	1.28352
	1.23146
	1.18396
	1.14025
	1.10141
	1.06944
	1.04245
	1.01952
	1.00165
	0.99201
	0.98799
	0.98819
	0.99382
	0.9817
	0.9757
	0.94342
	0.91523
	0.89149
	0.87462
	0.8659
	0.86195
	0.86686
	0.87882
	0.89745
	0.92222
	0.95589
	0.99264
	1.03845
	1.09017
	1.14635
	1.20758
	1.26644
	1.3289
	1.34246
	1.3642
	1.39441
	1.43185
	1.47573
	1.52636
	1.52964
	1.53832
	1.48072
	1.42738
	1.38486
	1.3465
	1.30945
	1.27684
	1.25093
	1.23038
	1.21532
	1.20577
	1.1724
	1.14689
	1.09345
	1.04497
	1.00138
	0.96305
	0.91559
	0.91942
	0.90542
	0.89837
	0.89913
	0.90651
	0.91804
	0.93636
	0.92898
	0.92793
	0.88308
	0.9608
	0.99849
	1.04102
	1.08968
	1.1431
	1.19975
	1.26066
	1.32759
	1.39831
	1.47154
	1.54807
	1.62817
	1.71001
	1.79412
	1.88082
	1.97278
	2.06685
	2.16048
	2.256
	2.34641
	2.43603
	2.52782
	2.62154
	2.64555
	2.80782
	2.87455
	3.02683
	3.10793
	3.23832
	3.34118
	3.46493
	3.569
	3.67466
	3.7628
	3.85608
	3.89351
	3.93312
	3.97219
	4.01438
	4.05872
	4.10558
	4.15512
	4.20748
	4.2647
	4.31836
	4.3797
	4.44321
	4.50826
	4.5742
	4.62118
	4.67082
	4.68829
	4.70951
	4.72412
	4.74174
	4.76285
	4.78569
	4.79045
	4.79649
	4.74349
	4.69303
	4.62042
	4.56006
	4.49614
	4.43417
	4.39858
	4.37801
	4.33493
	4.29501
	4.20038
	4.11254
	4.03107
	3.95701
	3.88936
	3.83036
	3.78418
	3.75834
	3.71952
	3.68348
	3.62257
	3.56644
	3.51441
	3.46768
	3.42595
	3.38952
	3.32342
	3.26003
	3.19629
	3.13549
	3.07753
	3.02273
	2.97218
	2.9235
	2.87999
	2.83851
	2.79454
	2.75425
	2.68344
	2.61742
	2.54934
	2.4877
	2.43353
	2.38563
	2.34068
	2.30159
	2.2509
	2.20365
	2.1589
	2.11757
	2.08246
	2.04733
	2.01999
	1.99694
	1.94706
	1.9017
	1.85879
	1.82584
	1.79093
	1.82557
	1.8307
	1.83936
	1.85436
	1.87382
	1.88917
	1.90166
	1.91046
	1.92326
	1.94043
	1.96124
	1.97595
	1.99319
	1.97317
	1.95666
	1.93405
	1.91656
	1.90415
	1.89699
	1.89596
	1.90044
	1.90946
	1.92313
	1.94352
	1.96871
	1.9983
	2.03283
	2.07109
	2.11396
	2.12762
	2.14547
	2.14819
	2.15632
	2.16993
	2.18724
	2.20425
	2.21707
	2.21327
	2.21579
	2.22158
	2.23308
	2.25333
	2.27997
	2.27319
	2.35417
	2.46944
	2.6175
	2.68645
	2.75758
	2.81129
	2.86772
	2.92951
	2.99358
	3.02214
	3.05243
	3.07182
	3.09289
	3.12081
	3.15137
	3.18459
	3.22065
	3.24358
	3.26993
	3.29257
	3.31842
	3.34097
	3.36675
	3.3689
	3.37414
	3.38489
	3.39581
	3.41167
	3.42997
	3.4506
	3.47361
	3.50316
	3.53209
	3.56601
	3.60184
	3.64032
	3.68003
	3.70513
	3.73106
	3.75247
	3.77708
	3.80547
	3.83666
	3.87131
	3.9079
	3.86224
	4.05555
	4.12351
	4.18646
	4.21146
	4.23844
	4.26186
	4.28762

## Sheet: Fig.1B, 2A, 5A, 6A, 7A
z	r
-21.5	4.0577
-21.375	4.01672
-21.25	3.97848
-21.125	3.94375
-21	3.9104
-20.875	3.8806
-20.75	3.85271
-20.625	3.81822
-20.5	3.78635
-20.375	3.7586
-20.25	3.73187
-20.125	3.70912
-20	3.68922
-19.875	3.67094
-19.75	3.65449
-19.625	3.61031
-19.5	3.56746
-19.375	3.52214
-19.25	3.47941
-19.125	3.41196
-19	3.34655
-18.875	3.27628
-18.75	3.20955
-18.625	3.11687
-18.5	3.02735
-18.375	2.92519
-18.25	2.83077
-18.125	2.74557
-18	2.66944
-17.875	2.60192
-17.75	2.54404
-17.625	2.49836
-17.5	2.46392
-17.375	2.4392
-17.25	2.42596
-17.125	2.40286
-17	2.38556
-16.875	2.3028
-16.75	2.22637
-16.625	2.14137
-16.5	2.05791
-16.375	1.96418
-16.25	1.87234
-16.125	1.78439
-16	1.6982
-15.875	1.61791
-15.75	1.53826
-15.625	1.45189
-15.5	1.39749
-15.375	1.33846
-15.25	1.28352
-15.125	1.23146
-15	1.18396
-14.875	1.14025
-14.75	1.10141
-14.625	1.06944
-14.5	1.04245
-14.375	1.01952
-14.25	1.00165
-14.125	0.99201
-14	0.98799
-13.875	0.98819
-13.75	0.99382
-13.625	0.9817
-13.5	0.9757
-13.375	0.94342
-13.25	0.91523
-13.125	0.89149
-13	0.87462
-12.875	0.8659
-12.75	0.86195
-12.625	0.86686
-12.5	0.87882
-12.375	0.89745
-12.25	0.92222
-12.125	0.95589
-12	0.99264
-11.875	1.03845
-11.75	1.09017
-11.625	1.14635
-11.5	1.20758
-11.375	1.26644
-11.25	1.3289
-11.125	1.34246
-11	1.3642
-10.875	1.39441
-10.75	1.43185
-10.625	1.47573
-10.5	1.52636
-10.375	1.52964
-10.25	1.53832
-10.125	1.48072
-10	1.42738
-9.875	1.38486
-9.75	1.3465
-9.625	1.30945
-9.5	1.27684
-9.375	1.25093
-9.25	1.23038
-9.125	1.21532
-9	1.20577
-8.875	1.1724
-8.75	1.14689
-8.625	1.09345
-8.5	1.04497
-8.375	1.00138
-8.25	0.96305
-8.125	0.91559
-8	0.91942
-7.875	0.90542
-7.75	0.89837
-7.625	0.89913
-7.5	0.90651
-7.375	0.91804
-7.25	0.93636
-7.125	0.92898
-7	0.92793
-6.875	0.88308
-6.75	0.9608
-6.625	0.99849
-6.5	1.04102
-6.375	1.08968
-6.25	1.1431
-6.125	1.19975
-6	1.26066
-5.875	1.32759
-5.75	1.39831
-5.625	1.47154
-5.5	1.54807
-5.375	1.62817
-5.25	1.71001
-5.125	1.79412
-5	1.88082
-4.875	1.97278
-4.75	2.06685
-4.625	2.16048
-4.5	2.256
-4.375	2.34641
-4.25	2.43603
-4.125	2.52782
-4	2.62154
-3.875	2.64555
-3.75	2.80782
-3.625	2.87455
-3.5	3.02683
-3.375	3.10793
-3.25	3.23832
-3.125	3.34118
-3	3.46493
-2.875	3.569
-2.75	3.67466
-2.625	3.7628
-2.5	3.85608
-2.375	3.89351
-2.25	3.93312
-2.125	3.97219
-2	4.01438
-1.875	4.05872
-1.75	4.10558
-1.625	4.15512
-1.5	4.20748
-1.375	4.2647
-1.25	4.31836
-1.125	4.3797
-1	4.44321
-0.875	4.50826
-0.75	4.5742
-0.625	4.62118
-0.5	4.67082
-0.375	4.68829
-0.25	4.70951
-0.125	4.72412
0	4.74174
0.125	4.76285
0.25	4.78569
0.375	4.79045
0.5	4.79649
0.625	4.74349
0.75	4.69303
0.875	4.62042
1	4.56006
1.125	4.49614
1.25	4.43417
1.375	4.39858
1.5	4.37801
1.625	4.33493
1.75	4.29501
1.875	4.20038
2	4.11254
2.125	4.03107
2.25	3.95701
2.375	3.88936
2.5	3.83036
2.625	3.78418
2.75	3.75834
2.875	3.71952
3	3.68348
3.125	3.62257
3.25	3.56644
3.375	3.51441
3.5	3.46768
3.625	3.42595
3.75	3.38952
3.875	3.32342
4	3.26003
4.125	3.19629
4.25	3.13549
4.375	3.07753
4.5	3.02273
4.625	2.97218
4.75	2.9235
4.875	2.87999
5	2.83851
5.125	2.79454
5.25	2.75425
5.375	2.68344
5.5	2.61742
5.625	2.54934
5.75	2.4877
5.875	2.43353
6	2.38563
6.125	2.34068
6.25	2.30159
6.375	2.2509
6.5	2.20365
6.625	2.1589
6.75	2.11757
6.875	2.08246
7	2.04733
7.125	2.01999
7.25	1.99694
7.375	1.94706
7.5	1.9017
7.625	1.85879
7.75	1.82584
7.875	1.79093
8	1.82557
8.125	1.8307
8.25	1.83936
8.375	1.85436
8.5	1.87382
8.625	1.88917
8.75	1.90166
8.875	1.91046
9	1.92326
9.125	1.94043
9.25	1.96124
9.375	1.97595
9.5	1.99319
9.625	1.97317
9.75	1.95666
9.875	1.93405
10	1.91656
10.125	1.90415
10.25	1.89699
10.375	1.89596
10.5	1.90044
10.625	1.90946
10.75	1.92313
10.875	1.94352
11	1.96871
11.125	1.9983
11.25	2.03283
11.375	2.07109
11.5	2.11396
11.625	2.12762
11.75	2.14547
11.875	2.14819
12	2.15632
12.125	2.16993
12.25	2.18724
12.375	2.20425
12.5	2.21707
12.625	2.21327
12.75	2.21579
12.875	2.22158
13	2.23308
13.125	2.25333
13.25	2.27997
13.375	2.27319
13.5	2.35417
13.625	2.46944
13.75	2.6175
13.875	2.68645
14	2.75758
14.125	2.81129
14.25	2.86772
14.375	2.92951
14.5	2.99358
14.625	3.02214
14.75	3.05243
14.875	3.07182
15	3.09289
15.125	3.12081
15.25	3.15137
15.375	3.18459
15.5	3.22065
15.625	3.24358
15.75	3.26993
15.875	3.29257
16	3.31842
16.125	3.34097
16.25	3.36675
16.375	3.3689
16.5	3.37414
16.625	3.38489
16.75	3.39581
16.875	3.41167
17	3.42997
17.125	3.4506
17.25	3.47361
17.375	3.50316
17.5	3.53209
17.625	3.56601
17.75	3.60184
17.875	3.64032
18	3.68003
18.125	3.70513
18.25	3.73106
18.375	3.75247
18.5	3.77708
18.625	3.80547
18.75	3.83666
18.875	3.87131
19	3.9079
19.125	3.86224
19.25	4.05555
19.375	4.12351
19.5	4.18646
19.625	4.21146
19.75	4.23844
19.875	4.26186
20	4.28762

## Sheet: Fig.2C
	WT				I1284A					I1288A						DIIIAA
Iss/Ipeak	0.0072	0.0187	0.0374	0.0192	0.0331	0.0139	0.0156	0.022	0.0244	0.0308	0.0305	0.017	0.0126	0.0455	0.0188	0.178	0.2	0.24	0.204	0.173	0.191	0.146

## Sheet: Fig.2D
Voltage	WT Inorm								I1284A Inorm						I1288A Inorm						DIIIAA Inorm
-120	0.988	0.987	0.994	0.996	0.991	0.99	0.991	0.985	1	1	0.996	0.989	0.993	0.95	0.985	0.983	1	1	1	0.986	0.999	0.986	0.995	0.987
-115	0.997	0.999	0.996	0.995	0.997	0.996	0.996	0.99	0.991	0.976	1	0.986	1	0.952	0.983	0.986	0.994	0.993	0.976	0.991	0.998	0.993	0.996	0.987
-110	0.998	0.999	0.997	0.998	0.999	0.998	0.998	0.993	0.988	0.982	0.996	0.994	0.982	0.959	0.989	0.983	0.984	0.986	0.97	0.99	0.998	0.997	1	0.991
-105	0.994	0.999	0.998	0.998	1	0.999	1	0.996	0.985	0.98	0.995	0.991	0.976	0.954	0.991	0.989	0.977	0.986	0.972	0.992	1	0.998	0.997	0.993
-100	0.997	0.995	1	1	0.999	1	1	1	0.983	0.953	0.994	0.979	0.986	0.959	0.997	0.99	0.972	0.972	0.965	1	0.998	0.999	0.997	1
-95	1	1	0.999	0.998	0.999	0.999	1	0.999	0.981	0.958	0.999	1	0.972	0.963	0.998	0.995	0.966	0.963	0.953	0.989	0.998	0.998	0.996	0.995
-90	0.999	0.991	0.998	0.996	0.993	0.996	0.999	1	0.978	0.958	0.998	0.987	0.984	0.969	1	0.994	0.955	0.951	0.954	0.998	0.993	0.998	0.992	0.996
-85	0.997	0.988	0.997	0.99	0.986	0.989	0.997	0.998	0.971	0.944	0.984	0.981	0.971	0.977	0.999	0.996	0.95	0.952	0.953	0.991	0.991	1	0.988	1
-80	0.989	0.981	0.99	0.98	0.972	0.977	0.988	0.994	0.957	0.947	0.994	0.97	0.966	0.971	0.996	1	0.937	0.941	0.942	0.998	0.988	0.996	0.982	0.993
-75	0.976	0.955	0.972	0.961	0.947	0.953	0.97	0.98	0.96	0.925	0.989	0.959	0.968	1	1	0.996	0.933	0.945	0.929	0.999	0.978	0.991	0.974	0.991
-70	0.953	0.915	0.938	0.929	0.905	0.909	0.94	0.958	0.949	0.928	0.982	0.957	0.954	0.983	0.995	0.993	0.917	0.933	0.938	0.998	0.972	0.988	0.965	0.991
-65	0.901	0.875	0.88	0.87	0.839	0.837	0.89	0.914	0.938	0.907	0.974	0.957	0.944	0.98	0.978	0.988	0.899	0.913	0.924	0.981	0.958	0.973	0.942	0.977
-60	0.834	0.793	0.79	0.787	0.745	0.732	0.815	0.848	0.912	0.869	0.946	0.946	0.937	0.99	0.964	0.97	0.868	0.886	0.91	0.968	0.923	0.946	0.91	0.952
-55	0.724	0.677	0.665	0.669	0.626	0.596	0.708	0.757	0.859	0.854	0.896	0.884	0.922	0.951	0.916	0.929	0.828	0.836	0.866	0.944	0.864	0.897	0.855	0.914
-50	0.597	0.55	0.517	0.526	0.488	0.445	0.575	0.639	0.79	0.758	0.819	0.804	0.873	0.896	0.835	0.857	0.748	0.764	0.836	0.873	0.766	0.817	0.775	0.842
-45	0.448	0.391	0.36	0.372	0.35	0.299	0.427	0.502	0.682	0.642	0.718	0.692	0.822	0.804	0.714	0.747	0.634	0.636	0.747	0.78	0.63	0.699	0.652	0.741
-40	0.291	0.252	0.215	0.222	0.224	0.177	0.279	0.357	0.545	0.499	0.577	0.541	0.722	0.699	0.548	0.595	0.487	0.491	0.647	0.628	0.473	0.552	0.506	0.585
-35	0.158	0.134	0.101	0.108	0.124	0.0905	0.152	0.216	0.4	0.389	0.422	0.393	0.603	0.554	0.375	0.42	0.341	0.254	0.493	0.475	0.324	0.406	0.359	0.429
-30	0.0668	0.0502	0.0406	0.0461	0.06	0.0423	0.068	0.112	0.261	0.254	0.271	0.259	0.447	0.408	0.192	0.2	0.197	0.118	0.344	0.308	0.212	0.289	0.252	0.299
-25	0.0316	0.0168	0.0186	0.0241	0.0291	0.0207	0.0288	0.0586	0.146	0.119	0.106	0.162	0.307	0.239	0.0854	0.0969	0.0822	0.0623	0.141	0.155	0.147	0.219	0.185	0.22
-20	0.0174	0.0207	0.012	0.0132	0.015	0.0121	0.0144	0.0364	0.0636	0.0816	0.0543	0.0947	0.188	0.119	0.0517	0.0555	0.0271	0.028	0.052	0.081	0.119	0.188	0.158	0.194
-15	0.0114	0.00975	0.00915	0.00833	0.0113	0.00769	0.00783	0.0301	0.0362	0.0551	0.0319	0.0599	0.108	0.0476	0.0362	0.0394	0.0146	0.0258	0.0257	0.0677	0.108	0.179	0.15	0.181
-10	0.0133	0.0103	0.00759	0.00708	0.00788	0.00601	0.00669	0.0262	0.0317	0.0373	0.0253	0.0493	0.0498	0.0475	0.0262	0.0304	0.0123	0.0195	0.00709	0.0286	0.101	0.171	0.143	0.175
-5	0.00734	-0.00247	0.00621	0.00405	0.00698	0.00577	0.00529	0.0247	0.0174	0.0402	0.0189	0.039	0.0321	0.0325	0.023	0.0256	0.00943	0.0277	0.00224	0.0412	0.103	0.166	0.14	0.168
0	0.00602	0.000276	0.00621	0.00711	0.00781	0.00581	0.00397	0.0249	0.0251	0.0324	0.0142	0.0501	0.018	0.0303	0.0238	0.0248	0.00754	0.0226	0.0129	0.0369	0.0968	0.163	0.138	0.169
5									0.0188	0.0284	0.0132	0.0279	0.0312	0.0145	0.0181	0.0237	0.00491	0.0215	0.007	0.0201
10									0.0171	0.0309	0.012	0.034	0.0173	0.0109	0.0212	0.0171	0.00775	0.0215	0.00658	0.0149
15									0.0121	0.0372	0.0116	0.0312	0.0289	0.00491	0.0208	0.0212	0.00627	0.0053	0.00503	0.0287
20									0.0114	0.0295	0.0152	0.0331	0.0244	0.00284	0.0255	0.0217	0.00385	0.012	0.00296	0.0206

## Sheet: Fig.2G
time	WT Qslow/Qtot				DIII A Qslow/Qtot
0.5	0.276	0.328	0.374	0.317	0.284	0.326	0.307	0.389
0.8	0.353	0.404	0.437	0.359	0.348	0.425	0.368	0.447
1.1	0.397	0.448	0.476	0.41	0.404	0.449	0.413	0.416
1.4	0.437	0.485	0.504	0.442	0.441	0.503	0.468	0.491
1.7	0.465	0.511	0.528	0.475	0.477	0.533	0.48	0.504
2	0.485	0.529	0.546	0.485	0.485	0.543	0.514	0.501
2.299	0.504	0.543	0.558	0.511	0.501	0.549	0.513	0.518
2.799	0.527	0.572	0.577	0.538	0.514	0.597	0.529	0.533
3.299	0.54	0.585	0.588	0.551	0.55	0.615	0.544	0.55
3.799	0.551	0.595	0.597	0.562	0.545	0.593	0.557	0.567
4.3	0.56	0.604	0.605	0.573	0.557	0.627	0.568	0.594
4.8	0.566	0.614	0.61	0.592	0.564	0.627	0.575	0.592
5.3	0.572	0.618	0.617	0.587	0.56	0.63	0.599	0.621
6.3	0.578	0.633	0.625	0.607	0.588	0.629	0.574	0.595
7.3	0.593	0.641	0.631	0.61	0.595	0.634	0.617	0.656
8.3	0.592	0.65	0.634	0.619	0.596	0.666	0.614	0.632
9.3	0.599	0.654	0.638	0.624	0.628	0.662	0.601	0.633
10.3	0.602	0.657	0.642	0.63	0.612	0.689	0.633	0.672
11.3	0.603	0.664	0.644	0.632	0.603	0.664	0.636	0.666
14.3	0.607	0.676	0.65	0.647	0.616	0.718	0.655	0.671
17.299	0.606	0.684	0.657	0.652	0.654	0.704	0.67	0.662
20.299	0.617	0.69	0.66	0.661	0.656	0.731	0.676	0.663
23.299	0.62	0.695	0.662	0.664	0.67	0.743	0.685	0.695

## Sheet: Fig.2I
Time	DIIIAA Tau_Tail
23.299	0.74	1.02	0.776	0.695
20.299	0.724	1	0.762	0.677
17.299	0.703	0.981	0.757	0.663
14.3	0.683	0.962	0.741	0.651
11.3	0.676	0.937	0.726	0.636
10.3	0.659	0.927	0.719	0.627
9.3	0.652	0.91	0.713	0.624
8.3	0.65	0.895	0.702	0.609
7.3	0.637	0.88	0.693	0.6
6.3	0.616	0.867	0.681	0.587
5.3	0.608	0.842	0.663	0.575
4.8	0.596	0.826	0.658	0.568
4.3	0.591	0.819	0.649	0.56
3.799	0.585	0.804	0.638	0.547
3.299	0.579	0.786	0.62	0.534
2.799	0.56	0.764	0.603	0.522
2.299	0.54	0.736	0.57	0.499
2	0.526	0.718	0.546	0.479
1.7	0.505	0.687	0.511	0.452
1.4	0.47	0.652	0.464	0.42
1.1	0.418	0.605	0.407	0.371
0.8	0.362	0.518	0.344	0.319
0.5	0.275	0.311	0.256	0.242

## Sheet: Fig.2J
DIIIAA Tau_tail	DIIIAA Tau_FI
0.7395	0.447947
0.9638	0.655361
0.8128	0.50192
0.7378	0.795447

## Sheet: Fig.3A
V (mV)	Ipeak_norm				Iss_norm
-80	-0.00803	0.000246	0.00558	-0.026267	-1.96e-05	0.000246	0.0011	-0.00192929
-75	-0.00727	-4.91e-05	-0.00417	-0.0265116	3.34e-05	-4.91e-05	0.000911	-0.00155732
-70	-0.0139	-0.00159	-0.00464	0.0231887	-0.000619	-0.00159	0.000701	0.00109101
-65	-0.00992	-0.000219	-0.0055	0.0229511	-0.00171	-0.000219	0.000178	-0.00299585
-60	-0.0126	-0.00283	-0.0056	-0.0289792	-0.00576	-0.00283	-0.00217	-0.00253179
-55	-0.0309	-0.0102	-0.0131	-0.0283092	-0.0158	-0.0102	-0.00869	-0.00688757
-50	-0.052	-0.0258	-0.0265	-0.0363686	-0.0362	-0.0258	-0.0229	-0.0137322
-45	-0.0785	-0.0518	-0.0503	-0.0530878	-0.069	-0.0518	-0.0465	-0.028423
-40	-0.125	-0.0885	-0.08	-0.0778455	-0.109	-0.0885	-0.0762	-0.0614407
-35	-0.16	-0.161	-0.114	-0.117653	-0.149	-0.133	-0.107	-0.0933894
-30	-0.202	-0.207	-0.147	-0.165994	-0.18	-0.176	-0.133	-0.132109
-25	-0.253	-0.262	-0.185	-0.202191	-0.198	-0.203	-0.149	-0.157333
-20	-0.337	-0.385	-0.256	-0.233293	-0.2	-0.21	-0.153	-0.172854
-15	-0.475	-0.606	-0.398	-0.272584	-0.192	-0.207	-0.149	-0.18151
-10	-0.623	-0.825	-0.586	-0.32492	-0.176	-0.196	-0.138	-0.175163
-5	-0.726	-0.961	-0.74	-0.398495	-0.153	-0.176	-0.123	-0.152158
0	-0.768	-1.04	-0.819	-0.472402	-0.123	-0.146	-0.101	-0.133949
5	-0.748	-1.03	-0.834	-0.542102	-0.0877	-0.104	-0.0741	-0.115597
10	-0.686	-0.954	-0.786	-0.574113	-0.0498	-0.0576	-0.0443	-0.0808883
15	-0.581	-0.829	-0.689	-0.561574	-0.0123	-0.013	-0.0135	-0.040366
20	-0.442	-0.671	-0.558	-0.50194	0.0253	0.0317	0.017	-0.002698
25	-0.286	-0.48	-0.396	-0.412677	0.0614	0.0785	0.0477	0.0403735
30	-0.111	-0.27	-0.218	-0.268986	0.0961	0.121	0.0787	0.0802847
35	0.0611	-0.0609	-0.0253	-0.108241	0.128	0.158	0.108	0.113596
40	0.27	0.262	0.218	0.0847142	0.159	0.199	0.138	0.147093
45	0.454	0.413	0.381	0.33768	0.189	0.235	0.166	0.17995
50	0.637	0.613	0.59	0.547018	0.215	0.267	0.194	0.209697
55	0.821	0.805	0.796	0.780487	0.24	0.3	0.221	0.23877
60	1	1	1	1	0.263	0.333	0.247	0.261428

## Sheet: Fig.3B
V (mV)	Ipeak_norm			Iss_norm
-80	0.00601	-0.0259	0.00804	0.00582	-0.0438	0.0025
-75	0.00778	-0.0638	0.00802	0.00657	-0.042	0.00228
-70	0.00615	-0.0589	0.00713	0.00484	-0.042	0.0018
-65	0.00163	-0.062	0.00679	0.000418	-0.0423	0.000429
-60	0.00708	-0.0243	-0.00855	0.00786	-0.044	-0.00416
-55	0.00431	-0.068	-0.022	0.00295	-0.0532	-0.017
-50	0.00481	-0.0864	-0.0525	0.00512	-0.0712	-0.048
-45	-0.0114	-0.125	-0.115	-0.0123	-0.111	-0.109
-40	-0.0334	-0.19	-0.196	-0.0338	-0.173	-0.191
-35	-0.0722	-0.254	-0.291	-0.0727	-0.224	-0.243
-30	-0.123	-0.409	-0.523	-0.122	-0.253	-0.263
-25	-0.25	-0.553	-0.703	-0.161	-0.265	-0.267
-20	-0.567	-0.673	-0.827	-0.183	-0.265	-0.261
-15	-0.751	-0.786	-0.923	-0.193	-0.257	-0.248
-10	-0.874	-0.887	-0.978	-0.194	-0.244	-0.229
-5	-0.954	-0.957	-1	-0.185	-0.226	-0.204
0	-1	-1	-0.987	-0.167	-0.201	-0.173
5	-0.993	-0.994	-0.946	-0.141	-0.17	-0.14
10	-0.947	-0.941	-0.875	-0.112	-0.139	-0.105
15	-0.87	-0.868	-0.784	-0.0829	-0.108	-0.0722
20	-0.767	-0.756	-0.679	-0.0554	-0.0784	-0.04
25	-0.642	-0.63	-0.558	-0.0275	-0.0504	-0.00839
30	-0.506	-0.496	-0.433	-0.00162	-0.0235	0.0214
35	-0.364	-0.344	-0.307	0.0242	0.0015	0.0498
40	-0.222	-0.192	-0.178	0.0476	0.0226	0.0766
45	-0.0722	-0.0409	-0.0559	0.0718	0.0438	0.102
50	0.111	0.132	0.169	0.0937	0.0626	0.126
55	0.232	0.279	0.233	0.116	0.0792	0.149
60	0.358	0.418	0.338	0.136	0.0948	0.169

## Sheet: Fig.3C
Voltage	Ipeak_norm		Iss_norm
-80	0.00854	0.0125	0.00854	0.0125
-75	0.00778	0.0127	0.00778	0.0127
-70	0.00781	0.0127	0.00781	0.0127
-65	0.00703	0.0128	0.00703	0.0128
-60	0.00652	0.013	0.00652	0.013
-55	0.000902	0.0116	0.000902	0.0116
-50	-0.00678	0.00826	-0.00678	0.00826
-45	-0.0183	0.004	-0.0183	0.004
-40	-0.0291	-0.00215	-0.0291	-0.00215
-35	-0.0385	-0.00862	-0.0385	-0.00862
-30	-0.0483	-0.0129	-0.0483	-0.0129
-25	-0.0517	-0.015	-0.0517	-0.015
-20	-0.0466	-0.0116	-0.0466	-0.0116
-15	-0.0375	-0.00369	-0.0375	-0.00369
-10	-0.0246	0.00725	-0.0246	0.00725
-5	-0.00638	0.022	0	0.043
0	0.0117	0.0391	0.109	0.0803
5	0.0349	0.0582	0.163	0.123
10	0.0562	0.0774	0.244	0.179
15	0.0757	0.0978	0.313	0.244
20	0.0979	0.118	0.395	0.322
25	0.116	0.137	0.482	0.399
30	0.132	0.158	0.548	0.483
35	0.15	0.175	0.652	0.569
40	0.164	0.193	0.759	0.659
45	0.177	0.211	0.807	0.75
50	0.19	0.227	0.879	0.835
55	0.203	0.243	0.983	0.922
60	0.211	0.256	1	1

[truncated: 25 more sheets: Fig.3F, Fig.3G, Fig.3H, Fig.4B, Fig.4D, Fig.4F, Fig.4G, Fig.4I, Fig.5C, Fig.5D, Fig.5F, Fig.5H, Fig.5I, Fig.5J, Fig.6C, Fig.6D, Fig.6E, Fig.7C, Fig.7D, SuppleFig.1A …]
